# Supplementary material for: Observation of intermediates by online mass spectrometry to demonstrate the multiple mechanisms of dye-sensitized photocatalysis
Source: Royal Society of Chemistry journal article supplement (doi:10.1039/d1cc00908g), 2021-01-01
Supplement: d1cc00908g1.pdf [file d1cc00908g1.pdf]

## Supporting Information

### Observing of Intermediates by Online Mass Spectrometry to Demonstrate Multi-mechanisms of Dye-Sensitized Photocatalysis

Jianghui Sun, Xuchan Fan, Hua Lu, Hongwei Tan, Ying Zhang, Yan Wang, Yunling Zhao, Jin Ouyang, Na Na\*

Key Laboratory of Radiopharmaceuticals, Ministry of Education, College of Chemistry, Beijing Normal University, Beijing 100875, China.

\*Corresponding Author: nana@bnu.edu.cn

#### Table of Contents

|                                                                                                                                                                                                                             |     |
|-----------------------------------------------------------------------------------------------------------------------------------------------------------------------------------------------------------------------------|-----|
| Experimental Procedures.....                                                                                                                                                                                                | S2  |
| <b>Figure S1.</b> Characterizations of TiO <sub>2</sub> nanoparticles.....                                                                                                                                                  | S3  |
| <b>Figure S2.</b> Optimization of UV irradiation time in sUV-t Vis.....                                                                                                                                                     | S4  |
| <b>Figure S3.</b> Confirmation of the product.....                                                                                                                                                                          | S5  |
| <b>Figure S4.</b> Control experiments to confirm the origin of m/z 108.....                                                                                                                                                 | S6  |
| <b>Figure S5.</b> MS <sup>2</sup> CID of m/z 213 and 215.....                                                                                                                                                               | S7  |
| <b>Figure S6.</b> MS <sup>2</sup> CID of m/z 319.....                                                                                                                                                                       | S8  |
| <b>Figure S7.</b> Schematic diagram of the fragmentation mechanism of Intermediate <b>9</b> .....                                                                                                                           | S9  |
| <b>Figure S8.</b> MS <sup>2</sup> CID of m/z 107 and 317.....                                                                                                                                                               | S10 |
| <b>Figure S9.</b> Role of H <sub>2</sub> O <sub>2</sub> in the DSP reaction.....                                                                                                                                            | S11 |
| <b>Figure S10.</b> DFT calculations. ....                                                                                                                                                                                   | S12 |
| <b>Table S1.</b> Calculated bond dissociation energies (BDE) (kcal/mol) of the C <sub>d</sub> -N <sub>a</sub> bond in Intermediate <b>9</b> and its different protonation states via three different cleavage manners. .... | S13 |
| <b>Table S2.</b> Calculated bond dissociation energies (kcal/mol) of the C <sub>d</sub> -N <sub>a</sub> bond in Intermediate <b>11</b> and its different protonation states via three cleavage manners.....                 | S14 |
| DFT optimized Cartesian coordinates of all stationary point structures. ....                                                                                                                                                | S15 |
| <b>References</b> .....                                                                                                                                                                                                     | S20 |

## Experimental Procedures

**Chemicals** All reagents and solvents were purchased from commercial sources and used without further purification. HPLC grade methanol was purchased from Fisher Chemical (USA). *O*-Phenylenediamine was obtained from Alfa Aesar, and 2,3-diaminophenazine was obtained from Innochem. Titanium dioxide (P25) was purchased from Degussa Corp. Deionized water (Mill-Q, Millipore, 18.2 M $\Omega$  resistivity) was used in all experiments.

**Mass spectrometry** On-line monitoring was performed on an LTQ XL (Thermo Fisher Scientific, San Jose, CA, USA) instrument using a homemade ionization source of MF-EESI. The operational parameters were as follows: full-scan positive (+) ion spectra were obtained over the  $m/z$  range from 100 to 800; the temperature of the MS inlet capillary was 250 °C; the capillary voltage and tube lens voltage were set to 100 V and 120 V, respectively. The maximum ion injection time was 1000 ms. All MS results were obtained and processed using the Xcalibur or Microcal Origin (version 8.0) software.

**Other instruments** A Quantachrome NOVA 2000e sorption analyzer was used to examine the N<sub>2</sub> adsorption and desorption properties of three kinds of TiO<sub>2</sub> at liquid nitrogen temperature. Powder XRD patterns of all compounds were collected on a Shimadzu XRD-7000 automated diffraction system with Cu K $\alpha$  radiation ( $\lambda = 1.5406 \text{ \AA}$ ). The tube voltage and current were set at 40 kV and 30 mA, respectively. Measurements were made in a  $2\theta$  range of 20–40 ° at room temperature with a step of 0.02 ° ( $2\theta$ ). The scan speed was 2 degree/min. TEM were performed on a Tecnai G2 F20 transmission electron microscope (FEI Company, Hillsboro, OR, USA) under accelerating voltage of 200 kV. Fluorescence spectra were collected by an FS5 fluorescence spectrophotometer (Edinburgh Instruments, UK). UV–vis absorption spectra were carried out on a UV2450 spectrophotometer (Shimadzu, Japan). The product concentrations were determined by Agilent 7890 GC System with an Agilent 5975 Mass Selective Detector. <sup>1</sup>H NMR spectra was recorded on JEOL-400 spectrometers

**General photocatalysis procedure** Solutions of *ortho*-arylenediamine (0.9 mM) and DAP (0.1 mM) in water were placed in a quartz double-decker beaker (50 cm<sup>3</sup>). TiO<sub>2</sub> (1 mg/ml) were added to the beaker. The initial pH value was adjusted to ~5 by NaOH (1M) and HCl (1 M) solution. The mixture was vigorously stirred for 5 min before irradiation. Then, the reaction solution was photoirradiated for 25 min using a 250-W high-pressure mercury lamp (360 nm, from Shanghai Jiguang Special Lighting Appliance Factory) coupled to an additional longpass cut-off filters ( $\lambda \geq 450 \text{ nm}$ ) under continuous magnetic stirring. In the sUV-t experiment, the reaction solution was photoirradiated (UV light, 365nm) for 3 min under continuous magnetic stirring. Then additional longpass cut-off filters ( $\lambda \geq 450 \text{ nm}$ ) were used to control irradiation wavelength range during the reaction for 22 min visible light irradiation. After irradiation, the mixture was centrifuged to remove TiO<sub>2</sub> particles for further analysis. The on-line monitoring of MS was carried out under standard conditions. Before the spectrum measurements, TiO<sub>2</sub> was removed by centrifugation of aliquots (0.5 ml), after which the solution was diluted to 3 mL for the measurement.

**Computational procedure** Quantum chemical calculations were performed using density functional theory (DFT) at the B3LYP<sup>1-3</sup>/6-311G(d) level with the Gaussian 09<sup>4</sup> program package. Frequency calculations were performed to confirm all stationary points as local minima or transition states. The transition state was also verified with the intrinsic reaction coordinate (IRC) calculations. Moreover, the solvent effect was evaluated by using the SMD continuum solvent model with water as the solvent. The van der Waals effect was calculated by B3LYP-D using Grimme's D3 method<sup>6-7</sup>. The corrected Gibbs free energies were used in the energy profiles.

## Results and Discussion

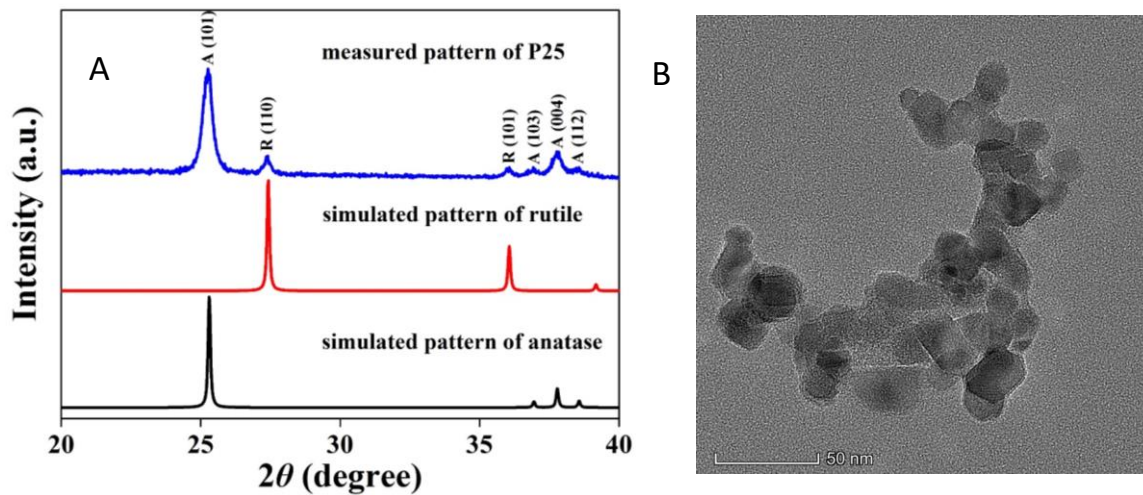

**Figure S1.** Characterizations of TiO<sub>2</sub> nanoparticles. (A) XRD patterns. (B) TEM image of P25.

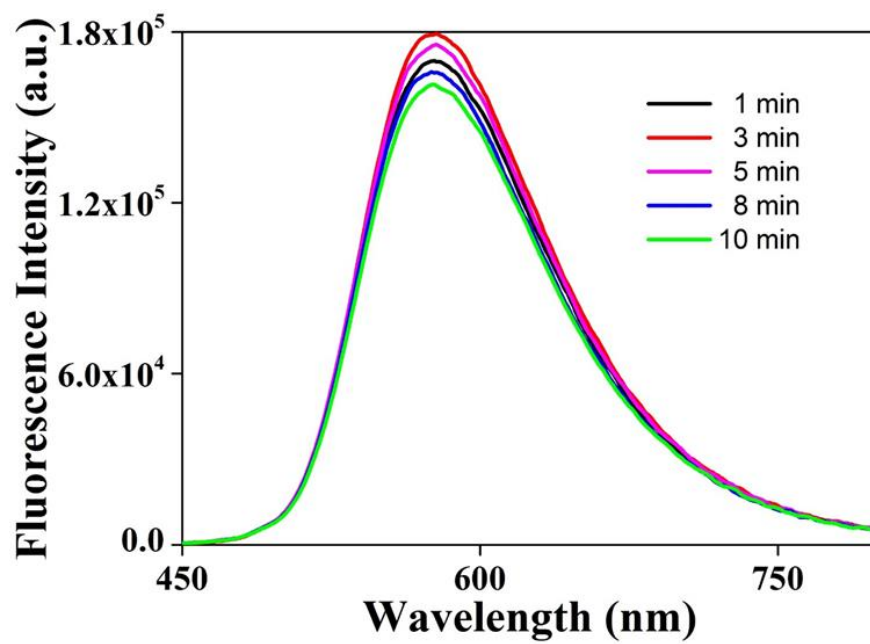

**Figure S2.** Optimization of UV irradiation time in sUV-t Vis. The FL spectra were obtained by increasing the UV irradiation time in the entire 25 min sUV-t Vis experiment.

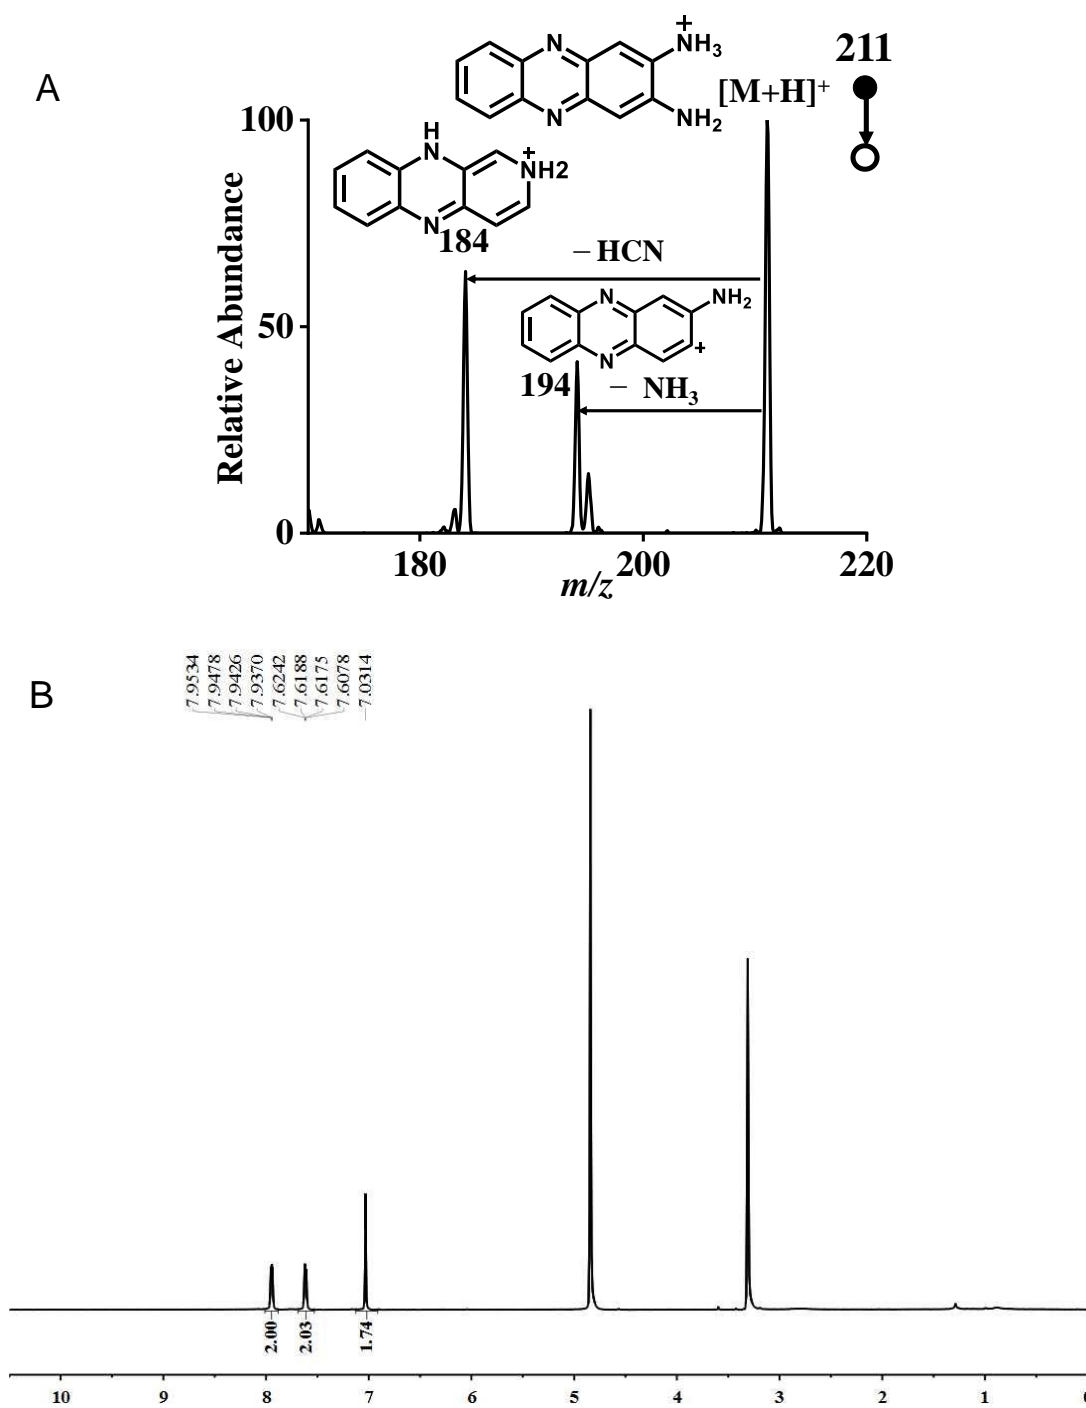

**Figure S3.** Confirmation of the product. (A) MS<sup>2</sup> CID of DAP at  $m/z$  211; (B) <sup>1</sup>H NMR chart of DAP (CD<sub>3</sub>OD, 600 MHz).<sup>8</sup>

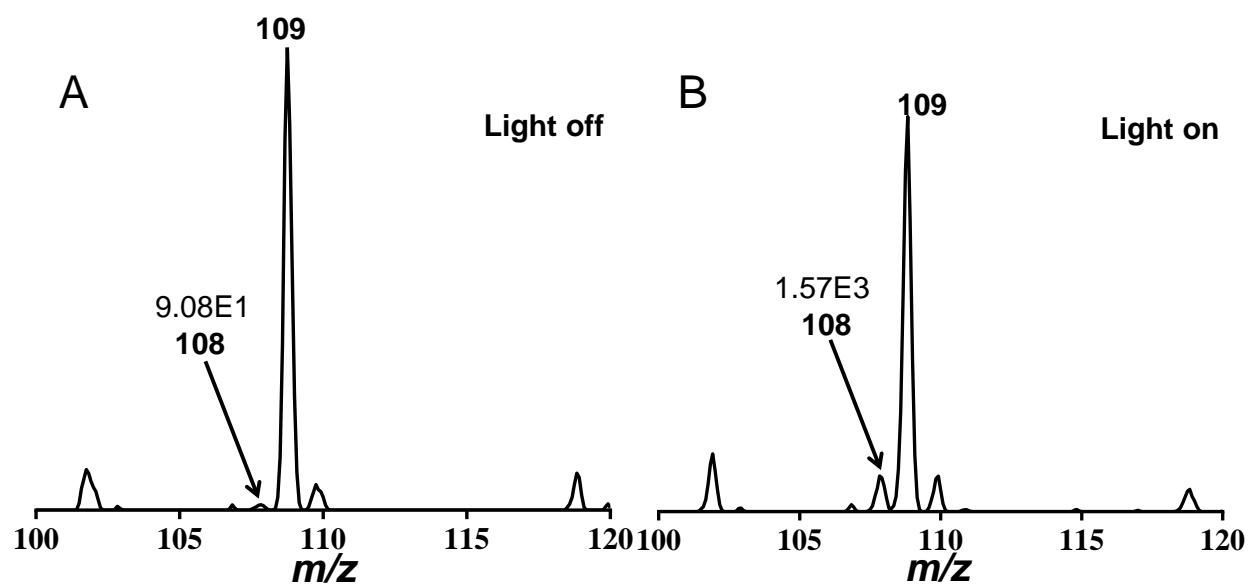

**Figure S4.** Control experiments to confirm the origin of  $m/z$  108. (A) Self-sensitized DSP without visible-light irradiation. (B) Self-sensitized DSP with visible-light irradiation.

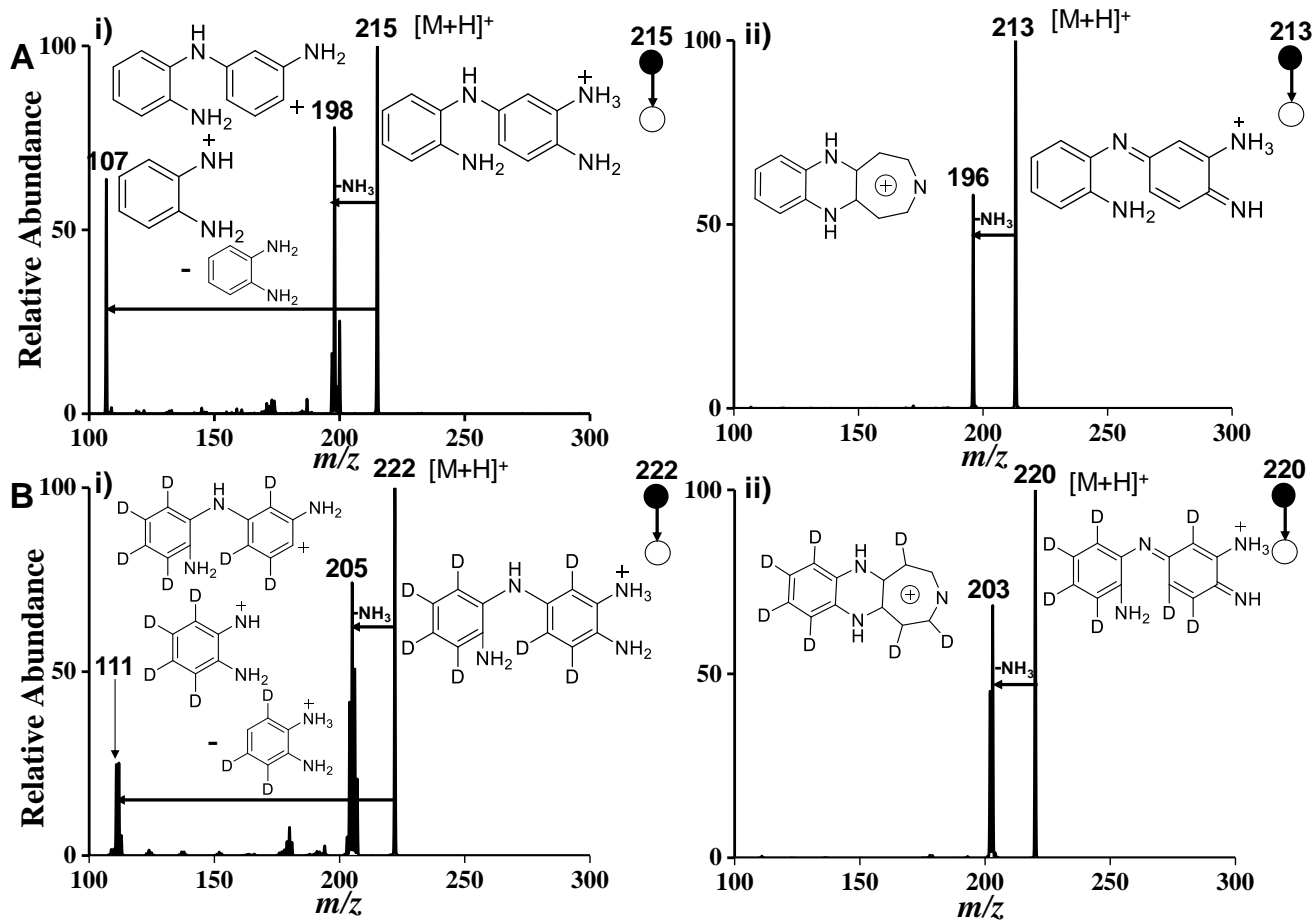

**Figure S5.** CID experiment to examine ions at  $m/z$  213 and 215. (A) MS<sup>2</sup> CID of the two intermediate ions at  $m/z$  213 (i) and  $m/z$  215 (ii). (B) MS<sup>2</sup> CID of the two deuterated intermediate ions at  $m/z$  222 (i) and  $m/z$  220 (ii).

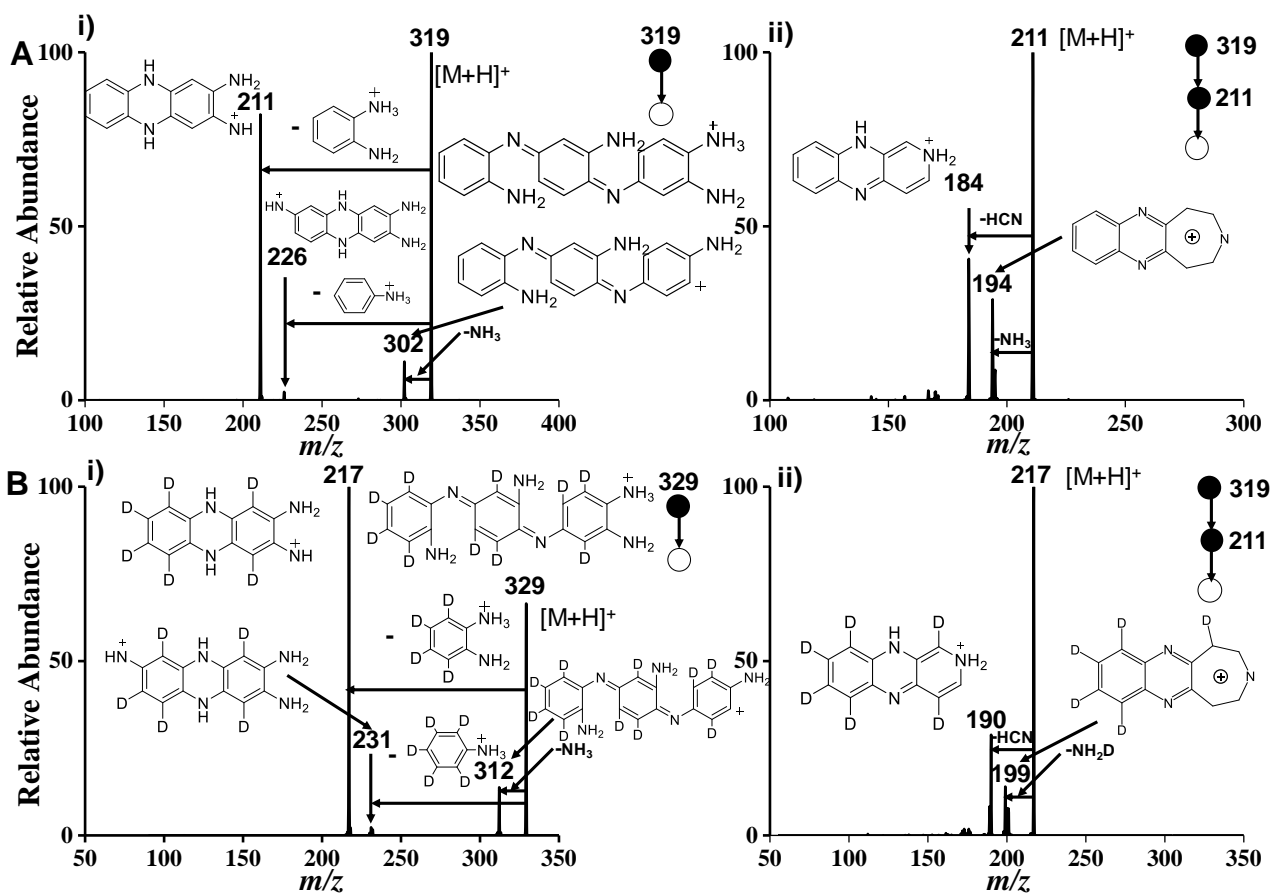

**Figure S6.** CID experiment to identify m/z 319. (A) MS<sup>n</sup> CID of the ion at m/z 319. (i) MS<sup>2</sup> CID. (ii) MS<sup>3</sup> CID. (B) MS<sup>n</sup> CID of the deuterated ion at m/z 329. (i) MS<sup>2</sup> CID. (ii) MS<sup>3</sup> CID.



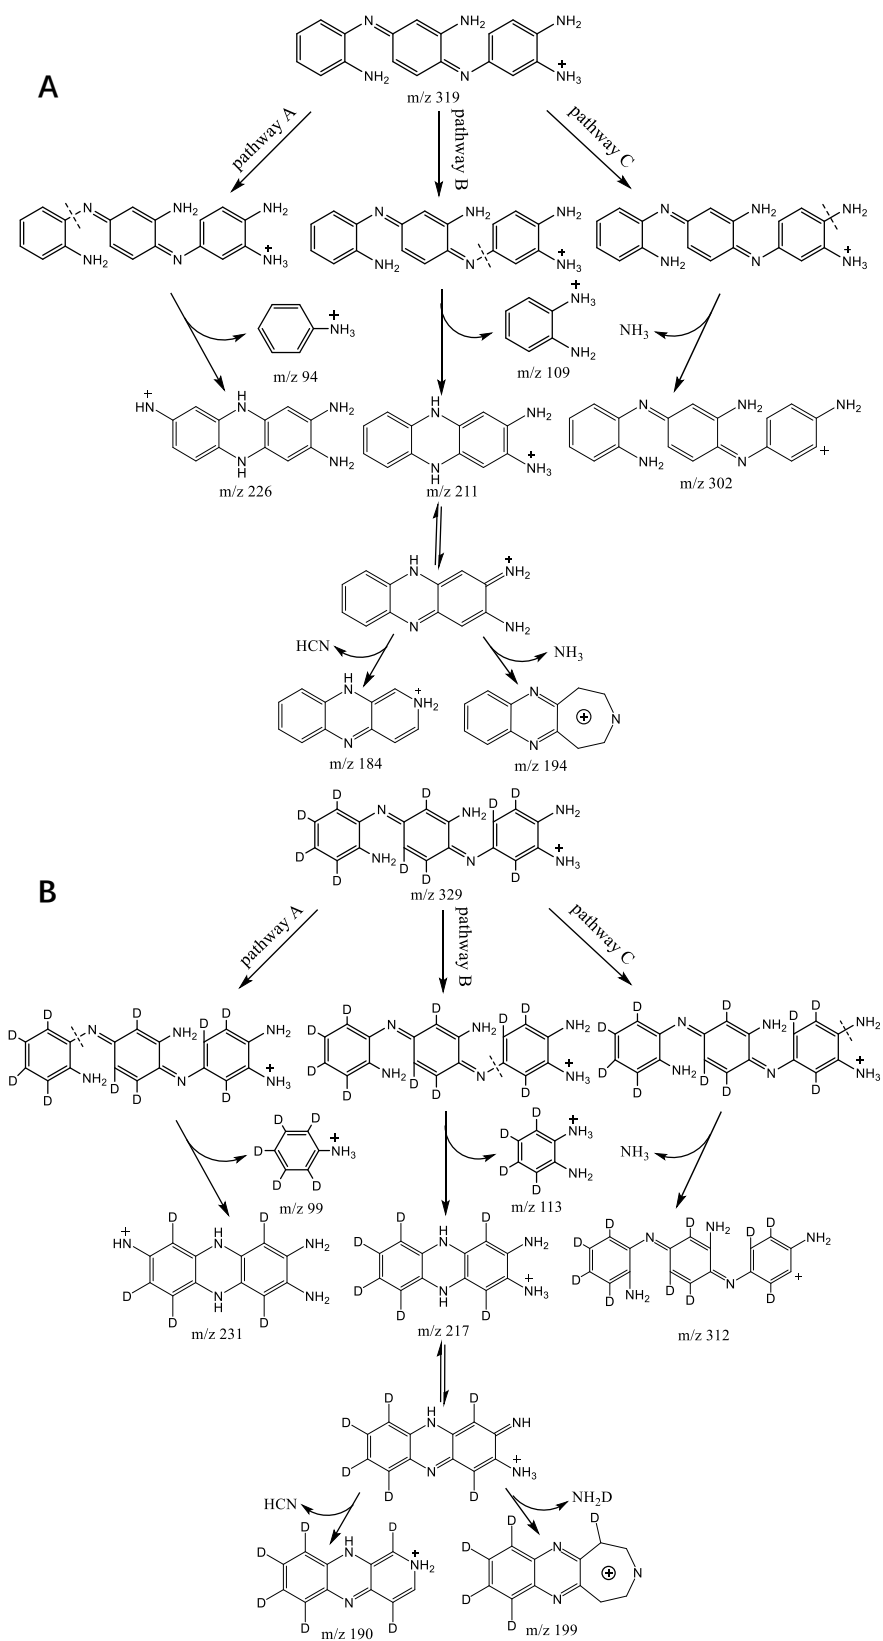

**Figure S7.** Schematic diagram of the fragmentation mechanism of Intermediate **9** generated by MS<sup>n</sup> CID. (A) The intermediate ion at m/z 319. (B) The deuterated intermediate ion at m/z 329.

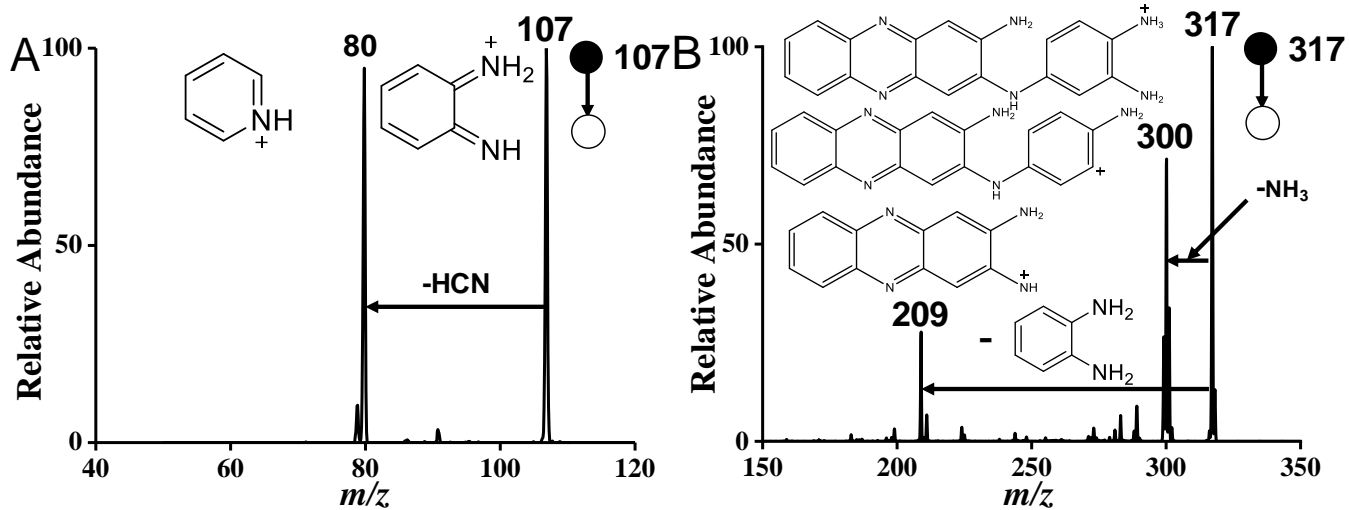

Figure S8. MS<sup>2</sup> CID of two intermediate ions at  $m/z$  107 (A) and 317 (B).

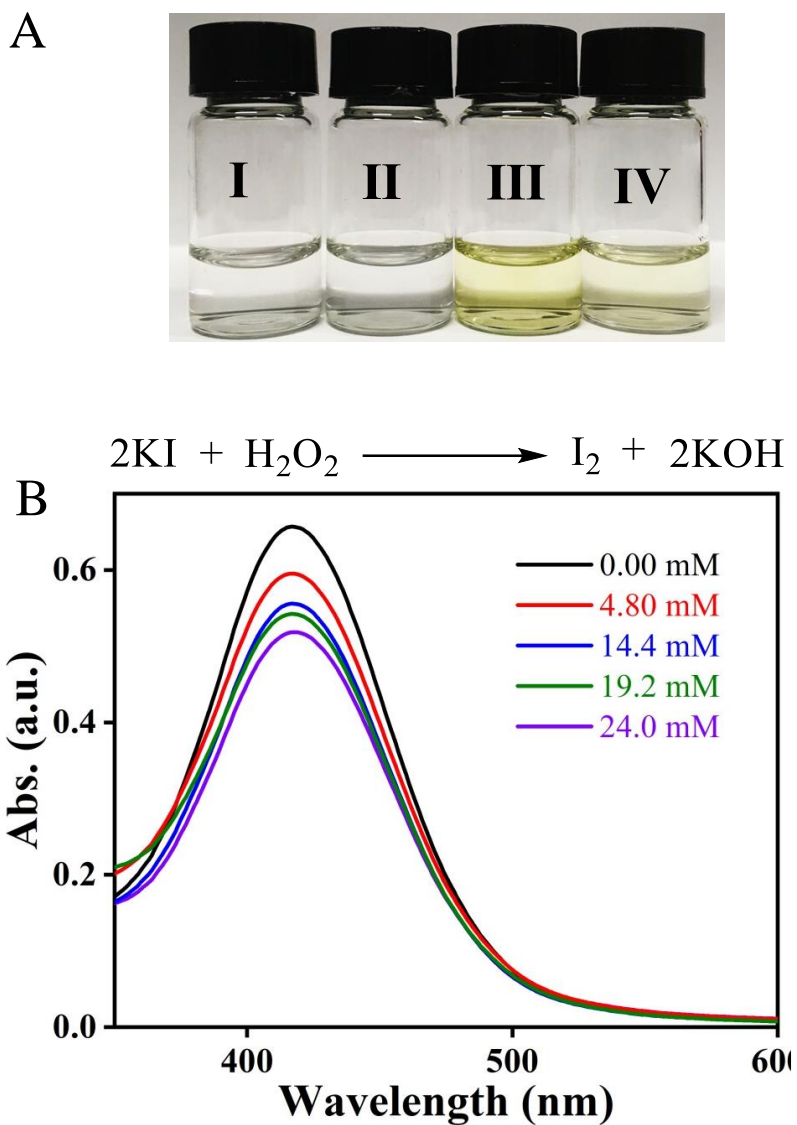

**Figure S9.** Role of  $\text{H}_2\text{O}_2$  in the DSP reaction. (A) The detection of generated  $\text{H}_2\text{O}_2$  by the titration reaction with KI. (I) Reaction system without visible irradiation. (II) Reaction system of (I) with the addition of KI. (III) Standard DSP reaction system with the addition of KI. (IV) Standard DSP reaction system without KI added. (B) Comparison of DSP reactions with the addition of different concentrations of DMTU.

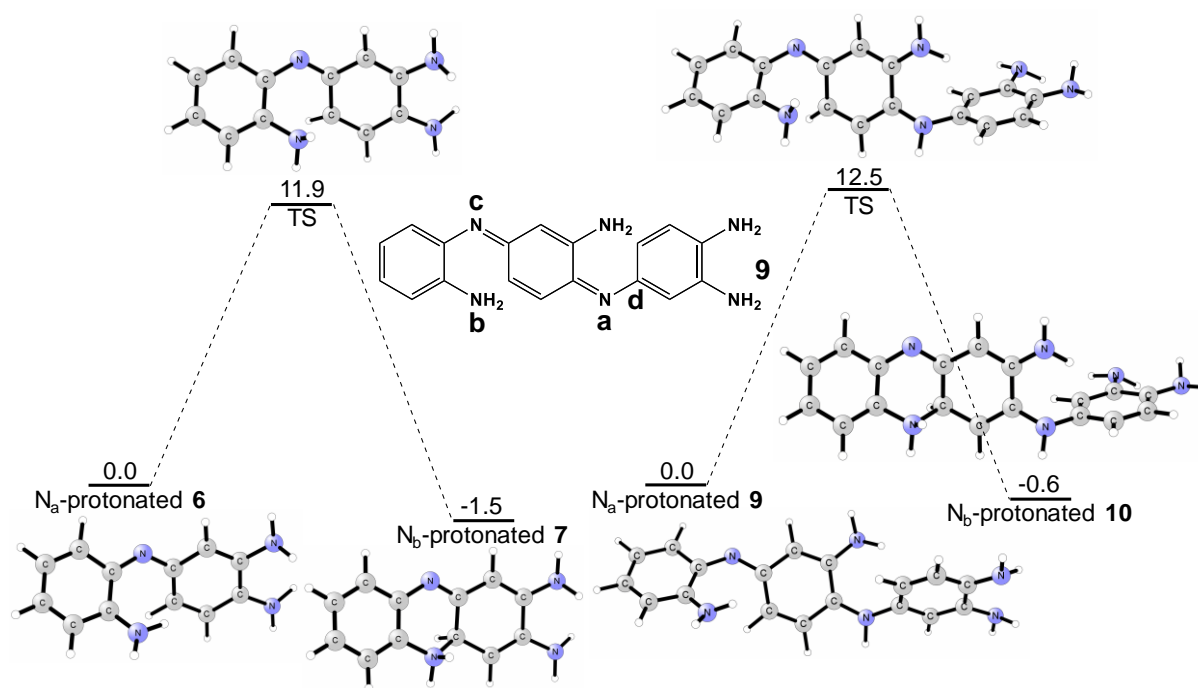

**Figure S10.** DFT-calculated energy profiles (kcal/mol) and the optimized geometries during the cyclization reaction of protonated intermediates **6** and **9**. Atom labels are shown on the structure of Intermediate **9**.

**Table S1.** Calculated bond dissociation energies (BDE) (kcal/mol) of the C<sub>d</sub>-N<sub>a</sub> bond in Intermediate **9** and its different protonation states via three different cleavage manners.

| entry | complexes <sup>[a]</sup> | $E_{\text{Heterolysis1}}$ <sup>[b]</sup> | $E_{\text{Heterolysis2}}$ <sup>[c]</sup> | $E_{\text{Homolysis}}$ <sup>[d]</sup> |
|-------|--------------------------|------------------------------------------|------------------------------------------|---------------------------------------|
| 1     | <b>9</b>                 | 108.3                                    | 126.3                                    | 70.9                                  |
| 2     | <b>9</b> -H1-1           | 63.4                                     | 101.6                                    | 55.6                                  |
| 3     | <b>9</b> -H1-2           | 99.6                                     | 155.0                                    | 75.8                                  |
| 4     | <b>9</b> -H2             | 62.7                                     | 135.1                                    | 66.5                                  |

[a] Complexes **9**-H1-1 (N<sub>a</sub>-protonated **9**), **9**-H1-2 and **9**-H2 represent protonation at N<sub>a</sub>, N<sub>c</sub>, N<sub>a</sub> and N<sub>c</sub> of Intermediate **9**, respectively. [b]  $E_{\text{Heterolysis1}}$  represents the heterolysis cleavage energy of the C<sub>d</sub>-N<sub>a</sub> bond with the bond electrons transferring to the dimer side. [c]  $E_{\text{Heterolysis2}}$  represents the heterolysis cleavage energy with the bond electrons transferring to the monomer side. [d]  $E_{\text{Homolysis}}$  represents homolysis cleavage energy of the C<sub>d</sub>-N<sub>a</sub> bond.

**Table S2.** Calculated bond dissociation energies (kcal/mol) of the C<sub>d</sub>-N<sub>a</sub> bond in Intermediate **11** and its different protonation states via three cleavage manners.

| entry | complexes <sup>[a]</sup> | $E_{\text{Heterolysis1}}$ <sup>[b]</sup> | $E_{\text{Heterolysis2}}$ <sup>[c]</sup> | $E_{\text{Homolysis}}$ <sup>[d]</sup> |
|-------|--------------------------|------------------------------------------|------------------------------------------|---------------------------------------|
| 1     | <b>11</b>                | 91.1                                     | 110.8                                    | 64.3                                  |
| 2     | <b>11-H1</b>             | 51.5                                     | 121.9                                    | 54.0                                  |
| 3     | <b>11-H2-1</b>           | 43.6                                     | 129.5                                    | 53.8                                  |
| 4     | <b>11-H2-2</b>           | 49.2                                     | 135.2                                    | 59.4                                  |
| 5     | <b>11-H2-3</b>           | 66.6                                     | 146.8                                    | 72.9                                  |

[a] Complexes **11-H1**, **11-H2-1**, **11-H2-2** and **11-H2-3** represent protonation state of Intermediate **11** on N<sub>a</sub>, N<sub>a</sub> and N<sub>b</sub>, N<sub>a</sub> and N<sub>c</sub>, N<sub>b</sub> and N<sub>c</sub>, respectively. [b]  $E_{\text{Heterolysis1}}$  represents the heterolysis cleavage energy of the C<sub>d</sub>-N<sub>a</sub> bond with the bond electrons transferring to the dimer side. [c]  $E_{\text{Heterolysis2}}$  represents the heterolysis cleavage energy of the C<sub>d</sub>-N<sub>a</sub> bond with the bond electrons transferring to the monomer side. [d]  $E_{\text{Homolysis}}$  represents homolysis cleavage energy of the C<sub>d</sub>-N<sub>a</sub> bond.

## DFT optimized Cartesian coordinates of all stationary point structures

### N<sub>a</sub>-protonated 6

|   |             |             |             |
|---|-------------|-------------|-------------|
| C | -1.17140800 | -4.15948200 | -0.03295100 |
| C | -0.39652800 | -3.12208400 | -0.46602400 |
| C | -0.72209400 | -1.74856400 | -0.18870500 |
| C | -2.01557900 | -1.47999100 | 0.42989500  |
| C | -2.79979200 | -2.57783700 | 0.84079600  |
| C | -2.38378800 | -3.87467300 | 0.63763600  |
| H | -0.87378300 | -5.18568000 | -0.20977200 |
| H | 0.53488900  | -3.28787000 | -0.99291200 |
| H | -3.75518500 | -2.38380400 | 1.31804600  |
| H | -3.01482700 | -4.68959400 | 0.97544200  |
| N | -2.52449000 | -0.22933000 | 0.55907100  |
| H | -3.51281200 | -0.12834300 | 0.73374400  |
| H | -2.08043400 | 0.55908800  | 0.11615600  |
| N | 0.19507400  | -0.88042200 | -0.63126300 |
| C | 0.51172900  | 0.36380800  | -0.27332400 |
| C | 1.37768500  | 1.06156300  | -1.18292900 |
| C | 0.18461100  | 1.01823400  | 0.96442300  |
| C | 1.85294100  | 2.32076300  | -0.93117400 |
| H | 1.62116300  | 0.55416600  | -2.10979900 |
| C | 0.70663300  | 2.24303400  | 1.26305600  |
| H | -0.41356300 | 0.50448300  | 1.70541000  |
| C | 1.56574300  | 2.91586100  | 0.34665600  |
| H | 0.51474200  | 2.69790900  | 2.22943000  |
| N | 2.71585900  | 3.04060200  | -1.77668100 |
| H | 3.08096100  | 2.49467900  | -2.54602100 |
| H | 2.31840000  | 3.90293500  | -2.13554900 |
| N | 2.14091300  | 4.08450800  | 0.65405900  |
| H | 2.02734600  | 4.50321500  | 1.56416900  |
| H | 2.90185700  | 4.41602500  | 0.07625600  |

### TS (6-7)

|   |             |            |             |
|---|-------------|------------|-------------|
| C | -5.09069800 | 1.82545800 | -1.15574600 |
| C | -4.08435900 | 2.63809200 | -1.66886700 |
| C | -4.15090500 | 4.03083700 | -1.53681000 |
| C | -5.28556100 | 4.59029700 | -0.90467800 |
| C | -6.31071900 | 3.78334200 | -0.43870500 |
| C | -6.20563500 | 2.39314900 | -0.54648800 |
| H | -5.01276600 | 0.74855700 | -1.25050400 |
| H | -3.22592100 | 2.21655600 | -2.17832700 |
| H | -7.18870700 | 4.22767200 | 0.01998900  |
| H | -6.99834800 | 1.76476400 | -0.15765000 |
| N | -5.32844400 | 6.03712400 | -0.78264000 |
| H | -5.88430800 | 6.35253800 | 0.00640700  |
| H | -5.66001900 | 6.50796800 | -1.62427400 |
| N | -3.17002600 | 4.80916400 | -2.15247100 |
| C | -2.87913400 | 5.98580500 | -1.70118800 |
| C | -2.09749400 | 6.87621800 | -2.52765600 |
| C | -3.42327000 | 6.51390100 | -0.41291200 |
| C | -1.92480900 | 8.18042400 | -2.20285400 |
| H | -1.75249500 | 6.47714400 | -3.47480000 |
| C | -3.18229600 | 7.85194400 | -0.06604500 |
| H | -3.46420700 | 5.78868900 | 0.39506400  |
| C | -2.42329300 | 8.66823200 | -0.89686800 |
| H | -3.43287100 | 8.20157600 | 0.92994600  |
| N | -1.21275500 | 9.10125200 | -2.96544800 |

|   |             |             |             |
|---|-------------|-------------|-------------|
| H | -0.77602600 | 8.71693000  | -3.79236900 |
| H | -1.70197400 | 9.96101900  | -3.18547800 |
| N | -2.04249200 | 9.90394300  | -0.54194200 |
| H | -2.29674600 | 10.28361800 | 0.35721100  |
| H | -1.25967200 | 10.33211100 | -1.01524200 |

### N<sub>b</sub>-protonated 7

|   |             |             |             |
|---|-------------|-------------|-------------|
| C | -1.56692600 | -4.05083100 | -0.00957400 |
| C | -0.55690100 | -3.28778600 | -0.58180300 |
| C | -0.47827400 | -1.90818400 | -0.33815000 |
| C | -1.46353800 | -1.35678200 | 0.49594600  |
| C | -2.49457100 | -2.09296600 | 1.05503800  |
| C | -2.53886000 | -3.46292400 | 0.80401800  |
| H | -1.60648800 | -5.11630200 | -0.20544800 |
| H | 0.18859900  | -3.73029700 | -1.23163200 |
| H | -3.24712000 | -1.62368200 | 1.68244000  |
| H | -3.32647200 | -4.06441500 | 1.24139900  |
| N | -1.36505100 | 0.10843100  | 0.70814500  |
| H | -1.84294300 | 0.37775700  | 1.56943200  |
| H | -1.81800700 | 0.63264500  | -0.05095000 |
| N | 0.49687400  | -1.14208300 | -0.96442500 |
| C | 0.76171800  | 0.04175500  | -0.50041900 |
| C | 1.64397900  | 0.92169100  | -1.18808700 |
| C | 0.10698100  | 0.54502500  | 0.78477100  |
| C | 1.77995900  | 2.23750100  | -0.84078500 |
| H | 2.11153300  | 0.53222500  | -2.08545700 |
| C | 0.24540700  | 1.99484400  | 1.07420300  |
| H | 0.48999500  | -0.05784900 | 1.62043000  |
| C | 1.08881000  | 2.77730000  | 0.36033100  |
| H | -0.17696200 | 2.36723100  | 2.00362800  |
| N | 2.56191300  | 3.11626800  | -1.53258500 |
| H | 3.00780300  | 2.78692300  | -2.37570200 |
| H | 2.27474200  | 4.08345200  | -1.56584000 |
| N | 1.33218700  | 4.10512600  | 0.64320500  |
| H | 0.88956700  | 4.47426800  | 1.47244600  |
| H | 2.29290100  | 4.40930100  | 0.55869700  |

### N<sub>a</sub>-protonated 9

|   |             |            |             |
|---|-------------|------------|-------------|
| C | -5.14590200 | 1.85386300 | -1.35822100 |
| C | -4.21413800 | 2.70709500 | -1.88444500 |
| C | -4.15087100 | 4.09373600 | -1.52640900 |
| C | -5.21827400 | 4.61690300 | -0.69284000 |
| C | -6.17893100 | 3.71568400 | -0.19287500 |
| C | -6.13508600 | 2.37120000 | -0.49549900 |
| H | -5.13657600 | 0.80054100 | -1.61086900 |
| H | -3.44595500 | 2.35930000 | -2.56413700 |
| H | -6.97110400 | 4.10152100 | 0.44146600  |
| H | -6.88999600 | 1.71110600 | -0.08222000 |
| N | -5.36373800 | 5.94613100 | -0.42161200 |
| H | -6.27160400 | 6.26498500 | -0.11928600 |
| H | -4.82412900 | 6.62654400 | -0.93287700 |
| N | -3.13829200 | 4.76073800 | -2.11230400 |
| C | -2.47384400 | 5.85589600 | -1.75345600 |
| C | -1.60920300 | 6.40834400 | -2.75049200 |
| C | -2.41377700 | 6.43762500 | -0.43858200 |
| C | -0.78007600 | 7.49250700 | -2.54767800 |
| H | -1.60083400 | 5.89905700 | -3.70797100 |
| C | -1.58310700 | 7.48992200 | -0.20634700 |
| H | -2.98216400 | 6.01212200 | 0.37731000  |
| C | -0.79010100 | 8.09327300 | -1.23268200 |

|   |             |             |             |
|---|-------------|-------------|-------------|
| H | -1.52030500 | 7.91180400  | 0.79288300  |
| N | 0.13769000  | 7.86879600  | -3.50696200 |
| H | 0.04030300  | 7.42497500  | -4.40724400 |
| H | 0.43101200  | 8.83129600  | -3.55815800 |
| N | -0.02717000 | 9.15303200  | -0.86649200 |
| C | 0.50060900  | 10.21656500 | -1.64015400 |
| C | 1.75889300  | 10.73374100 | -1.29798200 |
| C | -0.25007800 | 10.81745700 | -2.65445000 |
| C | 2.29140300  | 11.82037600 | -1.97891300 |
| H | 2.32695300  | 10.27465700 | -0.49398100 |
| C | 0.29060600  | 11.88772000 | -3.36122600 |
| H | -1.25687000 | 10.47766800 | -2.86793800 |
| C | 1.56000600  | 12.38868500 | -3.06317900 |
| H | -0.28752000 | 12.34673900 | -4.15705100 |
| N | 2.12155700  | 13.46306400 | -3.72962900 |
| H | 3.12205500  | 13.40832200 | -3.87207000 |
| H | 1.63084200  | 13.78804900 | -4.54931500 |
| N | 3.55095000  | 12.34860700 | -1.70555700 |
| H | 3.58449300  | 13.36110800 | -1.69524500 |
| H | 4.01694900  | 11.95933200 | -0.89860700 |
| H | 0.07446200  | 9.27500600  | 0.13366500  |

**TS (9-10)**

|   |             |             |             |
|---|-------------|-------------|-------------|
| C | -4.13474900 | 1.81110500  | -0.08498400 |
| C | -3.21495800 | 2.49911900  | -0.87059600 |
| C | -3.26957700 | 3.89398300  | -0.98670400 |
| C | -4.30634400 | 4.57357000  | -0.30664800 |
| C | -5.24812100 | 3.88588200  | 0.44233000  |
| C | -5.15431400 | 2.49748900  | 0.56871900  |
| H | -4.06448900 | 0.73281900  | 0.00274400  |
| H | -2.43484400 | 1.97579100  | -1.41086700 |
| H | -6.05065800 | 4.42460600  | 0.93729200  |
| H | -5.87865800 | 1.96293500  | 1.17204300  |
| N | -4.33012400 | 6.02115600  | -0.43230900 |
| H | -4.79120400 | 6.48140000  | 0.34649800  |
| H | -4.74817200 | 6.34925200  | -1.30278500 |
| N | -2.39444300 | 4.53837100  | -1.86010900 |
| C | -2.05638200 | 5.77459600  | -1.65481100 |
| C | -1.38670400 | 6.51383500  | -2.68191100 |
| C | -2.42234700 | 6.50455800  | -0.40267600 |
| C | -1.18071000 | 7.86476300  | -2.61793400 |
| H | -1.17607000 | 5.97284100  | -3.59806800 |
| C | -2.13277900 | 7.87556600  | -0.31262600 |
| H | -2.33189200 | 5.92048200  | 0.50965600  |
| C | -1.51981300 | 8.57474700  | -1.35281600 |
| H | -2.24337000 | 8.37477800  | 0.64486700  |
| N | -0.81360700 | 8.58442000  | -3.71785600 |
| H | -0.59482500 | 8.07514200  | -4.55955000 |
| H | -0.37258800 | 9.48403000  | -3.62569900 |
| N | -1.25717100 | 9.88993700  | -1.17900600 |
| C | -0.21646100 | 10.69849300 | -1.73422100 |
| C | 1.10079800  | 10.22070300 | -1.80113600 |
| C | -0.51048900 | 12.00048700 | -2.13363000 |
| C | 2.11972100  | 11.02134700 | -2.30850600 |
| H | 1.33645700  | 9.23274200  | -1.41726700 |
| C | 0.50382200  | 12.80443500 | -2.64474600 |
| H | -1.52725200 | 12.37339400 | -2.07932400 |
| C | 1.81273300  | 12.33281000 | -2.76619900 |
| H | 0.26918000  | 13.80944200 | -2.98085900 |
| N | 2.85475300  | 13.11012800 | -3.25034400 |

|   |             |             |             |
|---|-------------|-------------|-------------|
| H | 3.52292900  | 12.61717400 | -3.82929300 |
| H | 2.59387800  | 14.00205400 | -3.64428600 |
| N | 3.44048800  | 10.58708300 | -2.42935700 |
| H | 4.12567300  | 11.27522100 | -2.13870800 |
| H | 3.63491300  | 9.68638800  | -2.01547200 |
| H | -1.72777000 | 10.30663100 | -0.38510900 |

**N<sub>b</sub>-protonated 10**

|   |             |             |             |
|---|-------------|-------------|-------------|
| C | -2.84738200 | -5.88787700 | 1.32950900  |
| C | -2.08508200 | -5.22457300 | 0.37725200  |
| C | -1.95133900 | -3.82650000 | 0.41076500  |
| C | -2.62750900 | -3.15815300 | 1.44480500  |
| C | -3.41200000 | -3.79697900 | 2.39125300  |
| C | -3.51544900 | -5.18471100 | 2.33621400  |
| H | -2.93184100 | -6.96794100 | 1.28605200  |
| H | -1.58062700 | -5.76054500 | -0.41788000 |
| H | -3.92880300 | -3.23635600 | 3.16547400  |
| H | -4.11128600 | -5.71055100 | 3.07234200  |
| N | -2.49118100 | -1.68127800 | 1.43403600  |
| H | -2.67663400 | -1.29764400 | 2.36173200  |
| H | -3.16779200 | -1.24287600 | 0.79685000  |
| N | -1.24182600 | -3.16699700 | -0.58048900 |
| C | -0.86553000 | -1.93588900 | -0.37297900 |
| C | -0.24541500 | -1.16742600 | -1.38448700 |
| C | -1.07826800 | -1.27291700 | 0.98358900  |
| C | -0.01635400 | 0.18749600  | -1.27501100 |
| H | -0.06226700 | -1.67239600 | -2.32672500 |
| C | -0.88461900 | 0.19603900  | 1.03096000  |
| H | -0.44005800 | -1.78199200 | 1.71989600  |
| C | -0.34735800 | 0.89856600  | -0.00184500 |
| H | -1.02664500 | 0.69157200  | 1.98782000  |
| N | 0.42102000  | 0.90747600  | -2.32527900 |
| H | 0.63071900  | 0.44855700  | -3.19689900 |
| H | 0.64614500  | 1.88640200  | -2.24701800 |
| N | -0.20331100 | 2.26846300  | 0.06477900  |
| C | 0.96389800  | 3.00179100  | -0.34774700 |
| C | 2.25142700  | 2.52575600  | -0.06677600 |
| C | 0.80007400  | 4.22441200  | -0.99395600 |
| C | 3.37806400  | 3.24709100  | -0.45329800 |
| H | 2.37404300  | 1.59785800  | 0.48471500  |
| C | 1.92444500  | 4.95363000  | -1.38074400 |
| H | -0.19618400 | 4.59562200  | -1.20761100 |
| C | 3.21330600  | 4.47826700  | -1.14230100 |
| H | 1.79515600  | 5.89914300  | -1.89858400 |
| N | 4.36419300  | 5.18478600  | -1.48881700 |
| H | 5.10092600  | 4.61269200  | -1.88400400 |
| H | 4.20737500  | 6.01682800  | -2.03917000 |
| N | 4.68229100  | 2.79847700  | -0.23406700 |
| H | 5.31501500  | 3.52797700  | 0.07412300  |
| H | 4.75880500  | 1.97988100  | 0.35259500  |
| H | -0.70403100 | 2.69213400  | 0.83524800  |

**9**

|   |             |            |             |
|---|-------------|------------|-------------|
| C | -3.99947600 | 2.65312900 | 0.99622700  |
| C | -3.26949600 | 3.52935000 | 0.20210800  |
| C | -3.68192900 | 3.85052900 | -1.10363100 |
| C | -4.85697700 | 3.23151700 | -1.62089000 |
| C | -5.58881700 | 2.36384800 | -0.80155400 |
| C | -5.16771800 | 2.07924400 | 0.49241800  |
| H | -3.64977600 | 2.40432900 | 1.99258400  |



|   |             |             |             |
|---|-------------|-------------|-------------|
| H | -2.32955900 | 3.93120500  | 0.56410900  |
| H | -6.49524500 | 1.90824500  | -1.19141900 |
| H | -5.74592000 | 1.39370700  | 1.10397500  |
| N | -5.27626200 | 3.56261500  | -2.89939500 |
| H | -5.81360400 | 2.85666900  | -3.38007600 |
| H | -4.53829800 | 3.96923400  | -3.46076300 |
| N | -2.95223100 | 4.61720400  | -2.00218600 |
| C | -2.31675900 | 5.71639700  | -1.69750900 |
| C | -1.42404800 | 6.27092000  | -2.68694900 |
| C | -2.45232000 | 6.46352500  | -0.44693700 |
| C | -0.67839300 | 7.39937000  | -2.50136600 |
| H | -1.29389900 | 5.67916500  | -3.58865800 |
| C | -1.77142400 | 7.60724000  | -0.25864100 |
| H | -3.15523800 | 6.11477500  | 0.29851500  |
| C | -0.88451300 | 8.20211400  | -1.26192300 |
| H | -1.89690200 | 8.20124100  | 0.63971800  |
| N | 0.34139300  | 7.73225100  | -3.36728500 |
| H | 0.38123100  | 7.20159900  | -4.22425000 |
| H | 0.58806400  | 8.70383500  | -3.46883500 |
| N | -0.38449000 | 9.35055400  | -0.93798800 |
| C | 0.28155700  | 10.25409800 | -1.76462700 |
| C | 1.47742900  | 10.82691200 | -1.29513400 |
| C | -0.26952600 | 10.74377900 | -2.95995700 |
| C | 2.14816100  | 11.80423200 | -2.01950700 |
| H | 1.86771800  | 10.49164000 | -0.33909000 |
| C | 0.39502900  | 11.73631100 | -3.68137400 |
| H | -1.23228600 | 10.37747400 | -3.29903100 |
| C | 1.61076700  | 12.25803300 | -3.24841400 |
| H | -0.04408300 | 12.10760400 | -4.60404000 |
| N | 2.30311600  | 13.28087100 | -3.92568600 |
| H | 3.29496100  | 13.08617900 | -4.01411600 |
| H | 1.90871700  | 13.50326600 | -4.82950900 |
| N | 3.37647400  | 12.34791300 | -1.60900300 |
| H | 3.41451700  | 13.35421700 | -1.72955900 |
| H | 3.63740900  | 12.09215700 | -0.66657100 |

**9-H1-2**

|   |             |            |             |
|---|-------------|------------|-------------|
| C | -3.99669100 | 1.77954000 | 0.42166300  |
| C | -3.11924200 | 2.42843500 | -0.43571600 |
| C | -3.53121000 | 3.54766800 | -1.16140000 |
| C | -4.85032000 | 4.03290900 | -1.05934800 |
| C | -5.71897300 | 3.37150100 | -0.17491000 |
| C | -5.29905700 | 2.26648500 | 0.55014600  |
| H | -3.67110900 | 0.91318600 | 0.98480900  |
| H | -2.09709600 | 2.08004000 | -0.54542000 |
| H | -6.73847800 | 3.73093800 | -0.07224400 |
| H | -5.99805400 | 1.77434500 | 1.21774100  |
| N | -5.25770400 | 5.16469000 | -1.75326300 |
| H | -6.25611100 | 5.30030200 | -1.80857300 |
| H | -4.80006200 | 5.33230200 | -2.63706500 |
| N | -2.60486000 | 4.17338300 | -2.06590500 |
| C | -1.98750000 | 5.36286900 | -1.88953800 |
| C | -1.03273500 | 5.80084000 | -2.82669200 |
| C | -2.27139300 | 6.17343000 | -0.73916200 |
| C | -0.38453500 | 7.02271700 | -2.71177500 |
| H | -0.76924800 | 5.14525800 | -3.65263900 |
| C | -1.63500000 | 7.35914200 | -0.59698200 |
| H | -2.97625600 | 5.82045600 | 0.00052400  |
| C | -0.73601800 | 7.91375600 | -1.58881900 |
| H | -1.81824800 | 7.99080600 | 0.26346500  |

|   |             |             |             |
|---|-------------|-------------|-------------|
| N | 0.60325600  | 7.34563000  | -3.58425900 |
| H | 0.99625900  | 6.62177500  | -4.16524700 |
| H | 1.19479700  | 8.14309300  | -3.41636900 |
| N | -0.29680900 | 9.11879500  | -1.29791400 |
| C | 0.29972700  | 10.08837500 | -2.03358800 |
| C | 0.96771600  | 11.09713700 | -1.27779000 |
| C | 0.16824400  | 10.29697200 | -3.43621100 |
| C | 1.58182500  | 12.17639100 | -1.86795200 |
| H | 0.98355100  | 10.97715800 | -0.20007100 |
| C | 0.73045200  | 11.40089800 | -4.03349700 |
| H | -0.43002300 | 9.62212300  | -4.03433700 |
| C | 1.49977700  | 12.32367300 | -3.28864200 |
| H | 0.60031400  | 11.56365300 | -5.09885400 |
| N | 2.12708600  | 13.37575400 | -3.86815000 |
| H | 2.88106000  | 13.81291500 | -3.35718200 |
| H | 2.16039800  | 13.45349000 | -4.87204900 |
| N | 2.33654600  | 13.13684400 | -1.17048900 |
| H | 1.97967200  | 14.08244200 | -1.26347500 |
| H | 2.46375500  | 12.91945800 | -0.19119000 |
| H | -2.28469800 | 3.60995100  | -2.84326100 |

**9-H2**

|   |             |             |             |
|---|-------------|-------------|-------------|
| C | -4.01569000 | 2.59423400  | 0.97022000  |
| C | -3.37346300 | 3.56048400  | 0.22361700  |
| C | -3.84495900 | 3.87076200  | -1.06603500 |
| C | -4.99680100 | 3.21306800  | -1.59096800 |
| C | -5.60446700 | 2.21064600  | -0.82496400 |
| C | -5.12795800 | 1.91385200  | 0.44027000  |
| H | -3.63638900 | 2.32908300  | 1.94966700  |
| H | -2.46516900 | 4.01770000  | 0.59477700  |
| H | -6.47218400 | 1.69202800  | -1.21827900 |
| H | -5.61941900 | 1.14847100  | 1.02966300  |
| N | -5.42597500 | 3.55035900  | -2.86499200 |
| H | -6.16792000 | 2.97727400  | -3.24393500 |
| H | -5.58378400 | 4.53096900  | -3.05658300 |
| N | -3.16953800 | 4.70885800  | -1.95415400 |
| C | -2.35395800 | 5.76864600  | -1.72611700 |
| C | -1.47151400 | 6.18560600  | -2.74347500 |
| C | -2.37702900 | 6.48420700  | -0.48712600 |
| C | -0.61280900 | 7.26606200  | -2.59337900 |
| H | -1.39800500 | 5.59203500  | -3.64941000 |
| C | -1.56307700 | 7.56276500  | -0.32934200 |
| H | -3.08009200 | 6.21538900  | 0.28893900  |
| C | -0.69945700 | 8.03074500  | -1.36492400 |
| H | -1.62229800 | 8.13774800  | 0.58938700  |
| N | 0.30104100  | 7.55818600  | -3.56487900 |
| H | 0.47451900  | 6.85981200  | -4.27214500 |
| H | 1.09916200  | 8.13565900  | -3.35427700 |
| N | 0.02860800  | 9.15153300  | -1.07879200 |
| C | 0.55851000  | 10.17500600 | -1.84357200 |
| C | 1.52622700  | 11.01083000 | -1.23750200 |
| C | 0.06941100  | 10.49167600 | -3.13759000 |
| C | 2.06242500  | 12.09418800 | -1.90227000 |
| H | 1.85505200  | 10.80075100 | -0.22377300 |
| C | 0.59166900  | 11.56110200 | -3.81613700 |
| H | -0.73501300 | 9.92017600  | -3.57830700 |
| C | 1.63802800  | 12.34480600 | -3.26180300 |
| H | 0.21239300  | 11.81117600 | -4.80093700 |
| N | 2.22824200  | 13.32087600 | -3.96455200 |
| H | 3.10283800  | 13.71991100 | -3.65420200 |

|   |             |             |             |
|---|-------------|-------------|-------------|
| H | 1.95619000  | 13.51907400 | -4.91619700 |
| N | 3.04640000  | 12.90982000 | -1.37738900 |
| H | 2.90780700  | 13.90912400 | -1.46366100 |
| H | 3.39589800  | 12.66552100 | -0.46159100 |
| H | 0.13710600  | 9.30894900  | -0.08129400 |
| H | -3.26934500 | 4.41574700  | -2.92464500 |

**11**

|   |             |             |             |
|---|-------------|-------------|-------------|
| C | 4.26078600  | 12.91371800 | -2.84731700 |
| C | 5.51904400  | 13.51742700 | -2.91570900 |
| C | 5.66774900  | 14.85696100 | -3.25270200 |
| C | 4.51275700  | 15.61326200 | -3.56371700 |
| C | 3.26065100  | 15.00906000 | -3.50315700 |
| C | 3.11878200  | 13.66306300 | -3.13215800 |
| H | 4.17319900  | 11.88010300 | -2.53394600 |
| H | 2.37571800  | 15.57883600 | -3.77536800 |
| H | 6.95604100  | 16.36761800 | -2.83530700 |
| N | 6.92022600  | 15.50326800 | -3.36680200 |
| C | -1.28601200 | 5.40837100  | -0.71817600 |
| C | -0.52891400 | 5.86771600  | -1.76197500 |
| C | -1.73662300 | 6.29583000  | 0.29992800  |
| C | -0.17833100 | 7.24641200  | -1.84751900 |
| H | -0.17442100 | 5.21154700  | -2.54934600 |
| C | -1.41986200 | 7.62670700  | 0.25341600  |
| H | -2.33595500 | 5.90715000  | 1.11700300  |
| C | -0.63417600 | 8.14348200  | -0.81637600 |
| H | -1.74942900 | 8.32475000  | 1.01530300  |
| N | 0.56454900  | 7.67911200  | -2.88011900 |
| H | 7.69424700  | 14.90971600 | -3.09926100 |
| N | -0.33340500 | 9.45392300  | -0.84708000 |
| C | 0.40294900  | 9.88121600  | -1.87358000 |
| C | 0.78391200  | 11.25074200 | -1.94930600 |
| C | 0.86337800  | 8.98252400  | -2.91005000 |
| C | 1.53369800  | 11.74028100 | -2.98655200 |
| H | 0.46696000  | 11.90161300 | -1.14071600 |
| C | 1.63720400  | 9.50873900  | -3.97562400 |
| C | 1.95204100  | 10.84700900 | -4.05895100 |
| H | 1.93620900  | 8.82007400  | -4.75958100 |
| N | 2.57033200  | 11.37319100 | -5.17471000 |
| H | 3.08458200  | 12.23263200 | -5.06567400 |
| H | 3.01914400  | 10.70767500 | -5.78461200 |
| N | 1.81019700  | 13.11527000 | -3.08524700 |
| H | -1.54949200 | 4.35698200  | -0.66027600 |
| H | 1.15222400  | 13.68986800 | -2.57803100 |
| N | 4.68858200  | 16.96550900 | -3.88602100 |
| H | 5.50048500  | 17.12262600 | -4.47249900 |
| H | 3.86773600  | 17.40877000 | -4.27408500 |
| H | 6.40070200  | 12.93177700 | -2.66819900 |

**11-H1**

|   |            |             |             |
|---|------------|-------------|-------------|
| C | 3.84813400 | 13.02785800 | -2.34195600 |
| C | 5.10750300 | 13.56961900 | -2.07539300 |
| C | 5.53626600 | 14.75257100 | -2.67368600 |
| C | 4.68833600 | 15.40313600 | -3.61754700 |
| C | 3.42762300 | 14.86985800 | -3.87270500 |
| C | 3.02743600 | 13.69958500 | -3.22605600 |
| H | 3.53514300 | 12.11486700 | -1.85317200 |
| H | 2.77597400 | 15.36060800 | -4.59113300 |
| H | 6.79988000 | 16.31598000 | -2.37383000 |
| N | 6.78749100 | 15.30616500 | -2.44752500 |

|   |             |             |             |
|---|-------------|-------------|-------------|
| C | -0.93238300 | 5.46878200  | -0.61341300 |
| C | -0.45831000 | 5.95175700  | -1.79955600 |
| C | -1.08050400 | 6.32161500  | 0.52380300  |
| C | -0.10280600 | 7.32810300  | -1.91681000 |
| H | -0.33883000 | 5.32322300  | -2.67407400 |
| C | -0.75179800 | 7.64517100  | 0.45765900  |
| H | -1.46054500 | 5.90278600  | 1.44908300  |
| C | -0.25245800 | 8.19411300  | -0.76071300 |
| H | -0.85595800 | 8.31026400  | 1.30682800  |
| N | 0.35741400  | 7.79339200  | -3.08241800 |
| H | 7.33630000  | 14.86932100 | -1.72142400 |
| N | 0.06823900  | 9.49037400  | -0.81964800 |
| C | 0.52990600  | 9.94731300  | -1.98929000 |
| C | 0.87375900  | 11.32583800 | -2.10705400 |
| C | 0.67681000  | 9.09254000  | -3.13850900 |
| C | 1.34621300  | 11.78267400 | -3.29890400 |
| H | 0.73230600  | 11.96446800 | -1.24139900 |
| C | 1.18068400  | 9.63188400  | -4.35895400 |
| C | 1.52340200  | 10.95375700 | -4.45148300 |
| H | 1.28164600  | 8.95894100  | -5.20335400 |
| N | 1.94497700  | 11.62400100 | -5.63677600 |
| H | 2.95297200  | 11.74599000 | -5.68780700 |
| H | 1.64075400  | 11.14819900 | -6.47782200 |
| N | 1.63913600  | 13.21170200 | -3.51916700 |
| H | -1.20372000 | 4.42259400  | -0.52439200 |
| H | 0.95564500  | 13.78195000 | -3.01623000 |
| N | 5.14991900  | 16.57601700 | -4.19986000 |
| H | 6.12371400  | 16.55346900 | -4.47725700 |
| H | 4.56453800  | 16.97702300 | -4.91778000 |
| H | 5.75734500  | 13.06812900 | -1.36581800 |
| H | 1.47954100  | 13.33178000 | -4.53642700 |

**11-H2-1**

|   |             |             |             |
|---|-------------|-------------|-------------|
| C | 3.85285000  | 13.21682900 | -2.15520900 |
| C | 5.14319900  | 13.73418000 | -2.05169400 |
| C | 5.58130700  | 14.78538500 | -2.86168900 |
| C | 4.70323400  | 15.30857900 | -3.86734800 |
| C | 3.40877800  | 14.79724900 | -3.96162500 |
| C | 3.00864800  | 13.77252200 | -3.10024200 |
| H | 3.53769100  | 12.41884800 | -1.49438200 |
| H | 2.73279200  | 15.19897600 | -4.71216400 |
| H | 6.94134400  | 16.30557400 | -2.93982800 |
| N | 6.84539500  | 15.31237900 | -2.77483100 |
| C | -0.98529000 | 5.33736700  | -0.82767900 |
| C | -0.41774800 | 5.90195500  | -1.93400600 |
| C | -1.26491400 | 6.12403900  | 0.32954200  |
| C | -0.09931100 | 7.29452800  | -1.93788200 |
| H | -0.19359400 | 5.33393900  | -2.82844200 |
| C | -0.97859400 | 7.46856500  | 0.38014900  |
| H | -1.71632900 | 5.64675000  | 1.19206900  |
| C | -0.39415100 | 8.07039100  | -0.74696500 |
| H | -1.19855600 | 8.05206500  | 1.26818800  |
| N | 0.44759900  | 7.84465400  | -3.01570200 |
| H | 7.44222200  | 14.97660600 | -2.03364900 |
| N | -0.07654800 | 9.38954000  | -0.79131700 |
| C | 0.48540100  | 9.98571900  | -1.87719800 |
| C | 0.79150200  | 11.36135200 | -1.91997100 |
| C | 0.74412000  | 9.15672100  | -3.01791600 |
| C | 1.35196800  | 11.86204200 | -3.06750800 |
| H | 0.56313600  | 12.00538500 | -1.07612000 |

|   |             |             |             |
|---|-------------|-------------|-------------|
| C | 1.34229500  | 9.72728600  | -4.16713400 |
| C | 1.67063200  | 11.06722300 | -4.21450800 |
| H | 1.53690000  | 9.06919000  | -5.00582600 |
| N | 2.16501400  | 11.71521400 | -5.33731800 |
| H | 3.01474000  | 12.25370500 | -5.20676100 |
| H | 2.21963100  | 11.14724400 | -6.17276700 |
| N | 1.57944200  | 13.31299400 | -3.20019500 |
| H | -1.23076400 | 4.28212300  | -0.81726700 |
| H | 0.99074900  | 13.82188800 | -2.53343300 |
| N | 5.16515600  | 16.33625500 | -4.65859700 |
| H | 6.13060500  | 16.28077400 | -4.95524200 |
| H | 4.55446600  | 16.69006100 | -5.37936900 |
| H | 5.81317800  | 13.33339300 | -1.29894200 |
| H | 1.24417300  | 13.56877900 | -4.14006900 |
| H | -0.27524800 | 9.95319000  | 0.03047900  |

**11-H2-2**

|   |             |             |             |
|---|-------------|-------------|-------------|
| C | 3.95620600  | 13.17597200 | -2.19728900 |
| C | 5.24571400  | 13.70603900 | -2.17739700 |
| C | 5.60624000  | 14.79595200 | -2.97425800 |
| C | 4.64467600  | 15.35104600 | -3.88084400 |
| C | 3.35129100  | 14.82659200 | -3.89264100 |
| C | 3.03396900  | 13.75832800 | -3.04742200 |
| H | 3.69895000  | 12.35226900 | -1.54212100 |
| H | 2.60899000  | 15.26043900 | -4.55861900 |
| H | 6.93758800  | 16.33764800 | -3.08727500 |
| N | 6.86917400  | 15.33544400 | -2.96795300 |
| C | -1.11996300 | 5.34699400  | -0.80602400 |
| C | -0.49664200 | 5.84962600  | -1.92989300 |
| C | -1.42564800 | 6.16805200  | 0.31256400  |
| C | -0.16121200 | 7.20957900  | -1.95777300 |
| H | -0.27235500 | 5.20625700  | -2.77429500 |
| C | -1.10512900 | 7.49894200  | 0.30279500  |
| H | -1.91591700 | 5.72897000  | 1.17301600  |
| C | -0.46151100 | 8.06396700  | -0.83444700 |
| H | -1.32323700 | 8.15482500  | 1.13667200  |
| N | 0.45523700  | 7.79180300  | -3.02944400 |
| H | 7.52363500  | 14.97717600 | -2.28829700 |
| N | -0.14826200 | 9.36495600  | -0.84429700 |
| C | 0.45291700  | 9.88269300  | -1.91061300 |
| C | 0.76686000  | 11.27422400 | -1.92582900 |
| C | 0.78999000  | 9.10999000  | -3.07646300 |
| C | 1.38183700  | 11.82393600 | -3.00554500 |
| H | 0.47371000  | 11.85512000 | -1.05730300 |
| C | 1.43659900  | 9.69124000  | -4.16936800 |
| C | 1.76639500  | 11.04674300 | -4.16069100 |
| H | 1.70552300  | 9.08665500  | -5.02937000 |
| N | 2.35540400  | 11.65556800 | -5.22154100 |
| H | 2.96316900  | 12.45131400 | -5.07571100 |
| H | 2.59077800  | 11.09638100 | -6.02888300 |
| N | 1.60629400  | 13.28774900 | -3.03463300 |
| H | -1.38443500 | 4.29593000  | -0.77586500 |
| H | 1.11131400  | 13.70209200 | -2.23776900 |
| N | 5.03078900  | 16.42009300 | -4.65784100 |
| H | 5.96992100  | 16.39179600 | -5.03241000 |
| H | 4.36036600  | 16.80259900 | -5.30711100 |
| H | 5.97762400  | 13.28486000 | -1.49689000 |
| H | 1.14217000  | 13.67126300 | -3.86663600 |
| H | 0.67174000  | 7.20506900  | -3.82934600 |

**11-H2-3**

|   |             |             |             |
|---|-------------|-------------|-------------|
| C | 4.62962100  | 13.02648200 | -2.81825700 |
| C | 5.76928300  | 13.75172100 | -3.09353900 |
| C | 5.69553700  | 15.10470200 | -3.49078000 |
| C | 4.40343800  | 15.70866800 | -3.69227500 |
| C | 3.26883600  | 14.96699600 | -3.40349000 |
| C | 3.36491200  | 13.63149800 | -2.96620500 |
| H | 4.71496400  | 12.02365500 | -2.41645600 |
| H | 2.29095000  | 15.41086800 | -3.56252900 |
| H | 6.73993200  | 16.86076700 | -3.61938900 |
| N | 6.80475600  | 15.85447800 | -3.67793800 |
| C | -1.68694100 | 5.36728700  | -0.92015800 |
| C | -0.79575400 | 5.81818800  | -1.87659200 |
| C | -2.16096600 | 6.23449000  | 0.08156400  |
| C | -0.36840000 | 7.15007600  | -1.83832800 |
| H | -0.42920800 | 5.15072600  | -2.64954100 |
| C | -1.74607300 | 7.55288200  | 0.13001700  |
| H | -2.85917700 | 5.86677400  | 0.82378000  |
| C | -0.84435300 | 8.02268900  | -0.83233500 |
| H | -2.11316700 | 8.21995700  | 0.90293500  |
| N | 0.52339700  | 7.66475100  | -2.76697800 |
| H | 7.71704000  | 15.46599600 | -3.49211800 |
| N | -0.39197400 | 9.32959400  | -0.84583000 |
| C | 0.49079300  | 9.83542600  | -1.75196900 |
| C | 0.95143500  | 11.13905800 | -1.72428300 |
| C | 0.98116400  | 8.93833600  | -2.77731100 |
| C | 1.87666700  | 11.62737500 | -2.66256400 |
| H | 0.61454400  | 11.80306000 | -0.93504300 |
| C | 1.88373500  | 9.40554000  | -3.72278500 |
| C | 2.34337900  | 10.72876200 | -3.72310300 |
| H | 2.22693000  | 8.73574900  | -4.50418400 |
| N | 3.12132100  | 11.15488400 | -4.73044100 |
| H | 3.52702100  | 12.07631300 | -4.75256600 |
| H | 3.29440600  | 10.56194600 | -5.52780200 |
| N | 2.19016900  | 12.95472000 | -2.61694800 |
| H | -2.02226700 | 4.33757600  | -0.94337800 |
| H | 1.49598200  | 13.53402400 | -2.15731900 |
| N | 4.36719200  | 17.02669600 | -4.10235100 |
| H | 4.97779500  | 17.28708000 | -4.86616900 |
| H | 3.45672500  | 17.45495000 | -4.18637700 |
| H | 6.74309900  | 13.30714500 | -2.91972000 |
| H | -0.74431800 | 9.94994600  | -0.12611200 |
| H | 0.85708000  | 7.03308900  | -3.48667300 |

## References

1. Becke AD. Density-functional thermochemistry. III. The role of exact exchange. *J Chem Phys* **98**, 5648-5652 (1993).
2. Lee C, Yang W, Parr RG. Development of the Colle-Salvetti correlation-energy formula into a functional of the electron density. *Phys Rev B* **37**, 785-789 (1988).
3. Stephens PJ, Devlin FJ, Chabalowski CF, Frisch MJ. *Ab initio* calculation of vibrational absorption and circular dichroism spectra using density functional force fields. *J Phys Chem* **98**, 11623-11627 (1994).
4. M. J. Frisch, G. W. Trucks, H. B. Schlegel, G. E. Scuseria, M. A. Robb, J. R. Cheeseman, G. Scalmani, V. Barone, B. Mennucci, G. A. Petersson, H. Nakatsuji, M. Caricato, X. Li, H. P. Hratchian, A. F. Izmaylov, J. Bloino, G. Zheng, J. L. Sonnenberg, M. Hada, M. Ehara, K. Toyota, R. Fukuda, J. Hasegawa, M. Ishida, T. Nakajima, Y. Honda, O. Kitao, H. Nakai, T. Vreven, J. A. Montgomery, Jr., J. E. Peralta, F. Ogliaro, M. Bearpark, J. J. Heyd, E. Brothers, K. N. Kudin, V. N. Staroverov, T. Keith, R. Kobayashi, J. Normand, K. Raghavachari, A. Rendell, J. C. Burant, S. S. Iyengar, J. Tomasi, M. Cossi, N. Rega, J. M. Millam, M. Klene, J. E. Knox, J. B. Cross, V. Bakken, C. Adamo, J. Jaramillo, R. Gomperts, R. E. Stratmann, O. Yazyev, A. J. Austin, R. Cammi, C. Pomelli, J. W. Ochterski, R. L. Martin, K. Morokuma, V. G. Zakrzewski, G. A. Voth, P. Salvador, J. J. Dannenberg, S. Dapprich, A. D. Daniels, O. Farkas, J. B. Foresman, J. V. Ortiz, J. Cioslowski and D. J. Fox, *Gaussian 09, Revision D.01*, Gaussian, Inc., Wallingford CT, 2013.
5. Marenich AV, Cramer CJ, Truhlar DG. Universal solvation model based on solute electron density and on a continuum model of the solvent defined by the bulk dielectric constant and atomic surface tensions. *J Phys Chem B* **113**, 6378-6396 (2009).
6. Grimme S, Antony J, Ehrlich S, Krieg H. A consistent and accurate *ab initio* parametrization of density functional dispersion correction (DFT-D) for the 94 elements H-Pu. *J Chem Phys* **132**, (2010).
7. Grimme S, Ehrlich S, Goerigk L. Effect of the damping function in dispersion corrected density functional theory. *J Comput Chem* **32**, 1456-1465 (2011).
8. D. He, Y. Wu and B. Q. Xu. Formation of 2,3-diaminophenazines and their self-assembly into nanobelts in aqueous medium. *European Polymer Journal* **43**, 3703-3709 (2007).
